1 **Evaluation of Viasure SARS-CoV-2 RT-qPCR kit (CerTest Biotec) using CDC FDA**  
2 **EUA RT-qPCR kit as a gold standard.**

3

4 Byron Freire-Paspuel<sup>1</sup>, Patricio Vega-Mariño<sup>2</sup>, Alberto Velez<sup>2</sup>, Paulina Castillo<sup>2</sup>, Marilyn Cruz<sup>2</sup>,  
5 Franklin Perez<sup>3</sup> and Miguel Angel Garcia-Bereguiain<sup>1</sup>.

6

7 1. One Health Research Group. Universidad de Las Americas. Quito. Ecuador

8 2. Agencia de Regulación y Control de la Bioseguridad y Cuarentena para Galápagos. Puerto  
9 Ayora. Ecuador.

10 3. OneLab. Santa Elena. Ecuador.

11 #corresponding author: Miguel Angel Garcia-Bereguiain (magbereguiain@gmail.com).

12 Running Head: *Evaluation of Viasure and CDC RT-qPCR kits for SARS-CoV-2.*

13

14 **Abstract. Background.** Several RT-qPCR kits are available for SARS-CoV-2 diagnosis, some of  
15 them with Emergency Use Authorization (EUA) by FDA, but most of them lacking of proper  
16 evaluation studies due to covid19 emergency. **Objective.** We evaluated Viasure RT-qPCR kit  
17 (CerTest Biotec, Spain) for SARS-CoV-2 diagnosis using CDC FDA EUA kit as gold standard.  
18 **Results.** Although we found the lack of RNA quality control probe as the main limitation for  
19 Viasure kit, the sensitivity was up to 97.5% and specificity was 100%. **Conclusions.** Viasure RT-  
20 qPCR kit is a reliable tool for SARS-CoV-2 diagnosis but improvement of an alternative RT-qPCR  
21 reaction for RNA extraction quality control as RNaseP is recommended.

22

23 **Background.**

24 Multiple in vitro RT-qPCR diagnosis kits are available on the market for the detection of SARS-  
25 CoV-2. Some of them have received emergency use authorization (EUA) from the U.S. Food &  
26 Drug Administration (FDA), while for others only limited report validations made by  
27 manufacturers are available. The CDC designed 2019-nCoV CDC EUA kit (IDT, USA) is based on  
28 N1 and N2 probes to detect SARS-CoV-2 that have received positive evaluation on recent  
29 reports (1-4), and and RNase P as an RNA extraction quality control. Among the commercial kits  
30 available in the market, Viasure SARS-CoV-2 RT-qPCR kit (CerTest Biotec; Spain) includes  
31 "ORF1ab" and "N" probes for SARS-CoV-2 detection. However, no probe for RNA extraction  
32 quality control is included but simply an "internal positive control" to guarantee that PCR  
33 reaction performs well. Viasure SARS-CoV-2 kit is made in Spain, one of the countries leading  
34 COVID19 cases and deaths worldwide, where it has been used for SARS-CoV-2 diagnosis. Also, it  
35 was recently authorized for SARS-CoV2 diagnosis in Ecuador. However, it is not included on the  
36 list of FDA EUA kits (5) and no evaluation study for Viasure SARS-CoV-2 RT-qPCR kit has been  
37 reported beyond the limited validation provided by manufacturer's manual including only two  
38 SARS-CoV-2 positive samples (6).

39 **Objective.**

40 This study compared the performance in terms of sensitivity and specificity of Viasure SARS-  
41 CoV-2 and 2019-nCoV CDC EUA kits for SARS-CoV-2 RT-qPCR diagnosis from nasopharyngeal  
42 samples.

43 **Study design.**

44 104 clinical specimens (nasopharyngeal swabs collected on 0.5mL TE pH 8 buffer) were included  
45 on this study, coming from individuals selected for SARS-CoV-2 surveillance at "LabGal"  
46 ("Agencia de Regulación y Control de la Bioseguridad y Cuarentena para Galápagos") in  
47 Galapagos Islands, starting on April 8th 2020. Also, four negative controls (TE pH 8 buffer) were  
48 included as control for carryover contamination.

#### 49 **Results.**

50 104 samples were tested for SARS-CoV-2 following an adapted version of the CDC protocol (1,2)  
51 using CFX96 BioRad instrument and PureLink Viral RNA/DNA Mini Kit (Invitrogen, USA) as an  
52 alternate RNA extraction method; also, same RNA samples were tested using Viasure SARS-  
53 CoV-2 RT-qPCR kit following manufacturer's manual (6). For the 2019-nCoV CDC EUA kit, 81  
54 samples tested positive and 23 samples tested negative (Tables 1 and 2). Considering only true  
55 positive samples for Viasure SARS-CoV-2 kit (amplification for both N and Orf1ab probes), 74  
56 samples tested positive and 30 samples were negative; but if we consider as positive not only  
57 true positives but also "presumptive positive" samples (only amplification of N probe), 79  
58 samples tested positive and 25 were negative (Tables 1 and 2). The range of Ct values obtained  
59 for 2019-nCoV CDC EUA were 22.61-38.58 and 24.02-41.7 for N1 and N2, respectively (Table 2).  
60 The range of Ct values obtained for Viasure SARS-CoV-2 kit were 22.50-38.00 and 22.67-40.03  
61 for N and Orf1ab, respectively (Table 2). The viral loads detailed on Table 2 were calculated  
62 running a calibration curve with 2019-nCoV N positive control (IDT, USA), with a detection limit  
63 below 1 viral RNA copy. Viral loads (copies/uL) values for 2019-nCoV CDC EUA kit  
64 positive/Viasure SARS-CoV-2 kit negative samples were 2 (sample ID 999c) and 3,8 (sample ID  
65 1603); viral loads (copies/uL) values for 2019-nCoV CDC EUA kit positive/Viasure SARS-CoV-2 kit

66 presumptive positive samples were 4,900 (sample ID 448), 8,8 (sample ID 772), 4,36 (sample ID  
67 1575), 2,96 (sample ID 1581) and 0,71 (sample ID 782) (See Table 2).

68 In summary, sensitivity for Viasure SARS-CoV-2 kit compared to 2019-nCoV CDC EUA was 91.4%  
69 if we considered only true positives, but up to 97.5% if we considered also presumptive  
70 positives as positive samples for SARS-CoV-2.

## 71 **Discussion**

72 Although the main limitation of our study is the sample size (104 specimens), our results  
73 support that Viasure SARS-CoV-2 RT-qPCR kit had a great performance in terms on sensitivity  
74 and specificity compared to 2019-nCoV CDC EUA, with values up to 97.5 and 100%,  
75 respectively. According to Viasure SARS-CoV-2 kit manufacturer's manual, when a sample only  
76 yields amplification for N probe but Orf1ab is negative, the result should be SARS-CoV-2  
77 negative and a possible infection by other coronavirus must be considered (6). However, on our  
78 hands, all the Viasure SARS-CoV-2 N positive/Orf1ab negative were confirmed as SARS-CoV-2  
79 positive by CDC protocol (1,2), and thus we referred to this samples as presumptive positive.  
80 Moreover, Viasure SARS-CoV-2 kit manufacturer's manual set a limit of detection of 10 viral  
81 copies/uL for its product. With the only exception of sample 448 (viral load of 4.300 copies/uL),  
82 all the Viasure SARS-CoV-2 kit presumptive positive and negative samples yield viral loads  
83 below 10 copies/uL, confirming the expected limit of detection of the kit.

84 The lack of any probe for RNA extraction quality control like RNaseP is a limitation to be  
85 considered when using Viasure SARS-CoV-2 kit. Although in our experience, samples failing to  
86 yield any RNA after extraction are below 1%, an extra RT-qPCR reaction for a RNA extraction  
87 quality control probe would be recommended for laboratories starting SARS-CoV-2 diagnosis.

88 On the other hand, Viasure SARS-CoV-2 kit is provided on precast format of 8 tubes strips  
89 containing a mix of enzymes, primers, buffer and nucleotides in stabilized format, so only  
90 rehydratation buffer and RNA samples have to be added. This format is a great advantage in  
91 terms of time saving and reduction on pippeting mistakes. Also, the manufacturer provided us  
92 upon request the concentration of the positive control included on Viasure SARS-CoV-2 kit  
93 (10.000 copies/uL). That means viral loads can be easy calculated without need of purchase any  
94 extra positive control, despite the manufacturer's manual does not include instruction for viral  
95 load calculation (6).

96 Considering the worldwide high demand of reagents for SARS-CoV RT-qPCR diagnosis, supplies  
97 shortage is a fact, actually affecting harder to developing countries like Ecuador. Under this  
98 scenario, validation studies are helpful to guarantee the quality of the supplies in the market for  
99 every country in the world, as not necessary all the SARS-CoV-2 RT-qPCR kits show the  
100 performance indicated by manufacturer (7).

#### 101 **Ethical considerations**

102 All samples have been submitted for routine patient care and diagnostics at Galapagos Islands.  
103 This study was authorized by "Comité de Operaciones Especiales Regional de Galápagos" that is  
104 leading board for Covid19 surveillance in Galapagos Islands. All data used in the current study  
105 was anonymized prior to being obtained by the authors.

#### 106 **Funding.**

107 None.

#### 108 **Authorship contribution statement.**

109 All authors contributed to study conceptualization, experimental procedures and revision and  
110 approval of final version of the manuscript.

111 Byron Freire-Paspuel and Miguel Angel García Bereguain analyzed the data and wrote the  
112 manuscript.

### 113 **Declaration of Competing Interest.**

114 All authors have no conflict of interest to declare.

### 115 **Acknowledgements.**

116 We thank the medical personnel from "Ministerio de Salud Pública" at Galapagos Islands and  
117 the staff from the "Agencia de Regulación y Control de la Bioseguridad y Cuarentena para  
118 Galápagos" for their support. We also thank Dr. Ronald Cedeño from OPS/WHO for his work  
119 during Covid 19 surveillance in Galapagos Islands. We specially thank Gabriel Iturralde, Oscar  
120 Espinosa and Dr Tannya Lozada from "Dirección General de Investigación de la Universidad de  
121 Las Américas", and also the authorities from Universidad de Las Américas, for logistic support to  
122 make SARS-CoV-2 diagnosis possible in Galapagos Islands.

### 123 **References.**

- 124 1. Xiaoyan Lu, Lijuan Wang, Senthilkumar K. Sakthivel, Brett Whitaker, Janna Murray, Shifaq  
125 Kamili, Brian Lynch, Lakshmi Malapati, Stephen A. Burke, Jennifer Harcourt, Azaibi Tamin,  
126 Natalie J. Thornburg, Julie M. Villanueva and Stephen Lindstrom. US CDC Real-Time Reverse  
127 Transcription PCR Panel for Detection of Severe Acute Respiratory Syndrome Coronavirus 2.  
128 *Emerging Infectious Diseases*. 2020. Volume 26:8.
- 129 2. Interim Guidelines for Collecting, Handling, and Testing Clinical Specimens from Persons for  
130 Coronavirus Disease 2019 (COVID-19). Center for Diseases Control and Prevention, USA.

- 131 <https://www.cdc.gov/coronavirus/2019-ncov/lab/guidelines-clinical-specimens.html> (last  
132 access 04/20/20).
- 133 3. Daniel D. Rhoads, Sree S. Cherian, Katharine Roman, Lisa M. Stempak, Christine L.  
134 Schmotzer, Navid Sadri. Comparison of Abbott ID Now, Diasorin Simplexa, and CDC FDA EUA  
135 methods for the detection of SARS-CoV-2 from nasopharyngeal and nasal swabs from  
136 individuals diagnosed with COVID-19. Accepted Manuscript Posted Online 17 April 2020.  
137 *J. Clin. Microbiol.* doi:10.1128/JCM.00760-20.
- 138 4. Arun K. Nallaa, Amanda M. Castob, Meei-Li W. Huanga, Garrett A. Perchettia, Reigran  
139 Sampoleoa, Lasata Shresthaa, Yulun Weia, Haiying Zhua, Keith R. Jeromea, Alexander L.  
140 Greningera. Comparative Performance of SARS-CoV-2 Detection Assays using Seven Different  
141 Primer/Probe Sets and One Assay Kit. JCM Accepted Manuscript Posted Online 8 April 2020. *J.*  
142 *Clin. Microbiol.* doi:10.1128/JCM.00557-20.
- 143 5. [https://www.fda.gov/medical-devices/emergency-situations-medical-devices/emergency-  
144 use-authorizations](https://www.fda.gov/medical-devices/emergency-situations-medical-devices/emergency-<br/>144 use-authorizations) (last accession date 06/14/2020).
- 145 6. <https://www.certest.es/wp-content/uploads/2020/03/IU-NCO212enes0420-rev.01.pdf>.
- 146 7. Byron Freire-Paspuel, Patricio Vega-Mariño, Alberto Velez, Paulina Castillo, Marilyn Cruz,  
147 Miguel Angel Garcia-Bereguaiain. Evaluation of nCoV-QS (MiCo BioMed) for RT-qPCR Detection  
148 of SARS-CoV-2 From Nasopharyngeal Samples Using CDC FDA EUA qPCR Kit as a Gold Standard:  
149 An Example of the Need of Validation Studies. *J Clin Virol.* 2020 May 22;128:104454. doi:  
150 10.1016/j.jcv.2020.104454.
- 151  
152  
153

154

155

156

157

158



**Table 1. Performance of Viasure SARS-CoV-2 compared to 2019-nCoV CDC EUA for RT-qPCR SARS-CoV-2 diagnosis (% values: sensitivity). Presumptive positive samples only amplified for N probe with Viasure SARS-CoV-2 kit.**

|                     | Viasure Positive | Viasure positive + presumptive positive | Viasure Negative | Total |
|---------------------|------------------|-----------------------------------------|------------------|-------|
| <b>CDC Positive</b> | 74 (91.4%)       | 79 (97.5%)                              | 2                | 81    |
| <b>CDC Negative</b> | 0                | 0                                       | 23               | 23    |
| <b>Total</b>        | 74               | 79                                      | 25               | 104   |

**Table 2. Ct Values for nCoV-2019 CDC EUA kit and Viasure SARS-CoV-2 RT-qPCR kits for all the samples included on the study. RNaseP is the RNA extraction quality control for nCoV-2019 CDC EUA kit. IPC is the internal positive control for Viasure SARS-CoV-2 kit. Samples in bold were positive for nCoV-2019 CD EUA kit but either negative or presuntive positive for Viasure SARS-CoV-2 kit (N/A means not amplified).**

| sample number | sample ID  | N1 Ct Value  | N2 Ct Value  | RNaseP Ct Value | Viral Load (copies/ $\mu$ L) | CDC Result      | ORF1a Ct Value | N Ct Value  | IPC Ct Value | VIASURE Result       |
|---------------|------------|--------------|--------------|-----------------|------------------------------|-----------------|----------------|-------------|--------------|----------------------|
| 1             | 943B       | 32,41        | 36,46        | 31,43           | 68                           | Positive        | 30,15          | 30,73       | 19,39        | Positive             |
| 2             | 958        | 27,45        | 32,8         | 28,24           | 6.900                        | Positive        | 26,75          | 27,49       | 19,66        | Positive             |
| 3             | 968        | 27,3         | 31,96        | 33,02           | 8.000                        | Positive        | 25,09          | 25,71       | 19,6         | Positive             |
| 4             | 977        | 30,4         | 35,31        | 29,14           | 450                          | Positive        | 29,71          | 30,14       | 19,48        | Positive             |
| 5             | 986        | 32,31        | 37,12        | 36,02           | 92                           | Positive        | 28,59          | 29,24       | 18,91        | Positive             |
| 6             | 992        | 26,06        | 30,08        | 30,46           | 17.000                       | Positive        | 26,19          | 26,33       | 19,16        | Positive             |
| 7             | 1008       | 26,86        | 32,46        | 35,99           | 10.000                       | Positive        | 23,73          | 24,46       | 18,78        | Positive             |
| 8             | 1009       | 31,9         | 35           | 31,11           | 170                          | Positive        | 29             | 30,02       | 18,82        | Positive             |
| 9             | 999        | 29,86        | 34,04        | 35,83           | 900                          | Positive        | 26,39          | 27,26       | 18,92        | Positive             |
| <b>10</b>     | <b>448</b> | <b>28,38</b> | <b>29,95</b> | <b>29,04</b>    | <b>4.900</b>                 | <b>Positive</b> | <b>N/A</b>     | <b>28,1</b> | <b>18,14</b> | Presumptive Positive |
| 11            | 449        | 25,93        | 27,99        | 28,26           | 25.000                       | Positive        | 25,84          | 25,93       | 18,74        | Positive             |
| 12            | 668        | 25,15        | 26,59        | 31,26           | 33.000                       | Positive        | 23,53          | 25,31       | 19,09        | Positive             |
| 13            | 943c       | 30,34        | 33,23        | 25,32           | 700                          | Positive        | 30,02          | 30,26       | 19,8         | Positive             |
| 14            | 944c       | 31,75        | 34,4         | 21,73           | 240                          | Positive        | 30,52          | 31,35       | 20,05        | Positive             |
| 15            | 945c       | 32,24        | 34,87        | 23,17           | 160                          | Positive        | 31,25          | 31,27       | 19,99        | Positive             |
| 16            | 946c       | 37,53        | 39,62        | 25,27           | 2,8                          | Positive        | 39,82          | 35,41       | 19,68        | Positive             |
| 17            | 949c       | 27,31        | 29,82        | 25,43           | 7.200                        | Positive        | 27,86          | 28,18       | 20,1         | Positive             |
| 18            | 950c       | 23,34        | 25,16        | 22,69           | 150.000                      | Positive        | 22,67          | 22,56       | 19,94        | Positive             |
| 19            | 955c       | 35,33        | 37,47        | 26,37           | 15                           | Positive        | 32,54          | 30,2        | 19,69        | Positive             |
| 20            | 963c       | 30,42        | 32,37        | 29,23           | 660                          | Positive        | 30,35          | 30,79       | 19,61        | Positive             |
| 21            | 965c       | 31,62        | 33,76        | 27,32           | 260                          | Positive        | 29,44          | 27,66       | 18,92        | Positive             |
| 22            | 966c       | 25,53        | 28,02        | 26,11           | 28.000                       | Positive        | 25,23          | 26,05       | 19,66        | Positive             |
| 23            | 967c       | 26,05        | 27,94        | 26,12           | 19.000                       | Positive        | 26,12          | 26,42       | 19,68        | Positive             |
| 24            | 968c       | 23,02        | 24,8         | 25,04           | 190.000                      | Positive        | 23,35          | 23,26       | 19,84        | Positive             |

|           |             |              |             |              |            |                 |            |              |              |                             |
|-----------|-------------|--------------|-------------|--------------|------------|-----------------|------------|--------------|--------------|-----------------------------|
| 25        | 970c        | 36,01        | 40,09       | 24,87        | 9          | Positive        | 38,63      | 35,83        | 20,06        | Positive                    |
| 26        | 983c        | 27,01        | 28,19       | 29,27        | 3.100      | Positive        | 26,76      | 27,6         | 19,42        | Positive                    |
| 27        | 985c        | 22,61        | 24,02       | 26,52        | 81.000     | Positive        | 25,08      | 25,72        | 19,54        | Positive                    |
| 28        | 986c        | 33,9         | 37,34       | 26,26        | 19         | Positive        | 32,84      | 30,13        | 18,86        | Positive                    |
| 29        | 988c        | 34,76        | 36,8        | 32,08        | 9,9        | Positive        | 34,3       | 34,79        | 19,06        | Positive                    |
| 30        | 989c        | 35,81        | 37,05       | 29,83        | 4,5        | Positive        | 35,6       | 36,24        | 21,06        | Positive                    |
| 31        | 991c        | 28,8         | 29,98       | 28,39        | 830        | Positive        | 28,69      | 28,72        | 18,92        | Positive                    |
| 32        | 993c        | 36,1         | 40,01       | 28,67        | 3,7        | Positive        | 39,82      | 36,6         | 19,01        | Positive                    |
| 33        | 997c        | 28,27        | 29,82       | 30,58        | 1.200      | Positive        | 28,43      | 29,11        | 19,57        | Positive                    |
| <b>34</b> | <b>999c</b> | <b>36,94</b> | <b>41,7</b> | <b>36,37</b> | <b>2,0</b> | <b>Positive</b> | <b>N/A</b> | <b>N/A</b>   | <b>17,69</b> | <b>Negative</b>             |
| 35        | 1008c       | 28,11        | 29,54       | 28,98        | 1.400      | Positive        | 29,08      | 29,46        | 19,3         | Positive                    |
| 36        | 1009c       | 30,64        | 32,08       | 30,05        | 210        | Positive        | 30,99      | 31,2         | 19,28        | Positive                    |
| 37        | 1102        | 34,05        | 34,43       | 27,53        | 32         | Positive        | 38,11      | 34,04        | 19,58        | Positive                    |
| <b>38</b> | <b>772</b>  | <b>34,42</b> | <b>35,2</b> | <b>28,16</b> | <b>8,8</b> | <b>Positive</b> | <b>N/A</b> | <b>35,14</b> | <b>19,47</b> | <b>Presumptive Positive</b> |
| 39        | 1289        | 33,5         | 34,71       | 27,09        | 15,8       | Positive        | 34,48      | 34,69        | 19,64        | Positive                    |
| 40        | 1290        | 31           | 32,15       | 23,68        | 157        | Positive        | 31,05      | 32,05        | 19,04        | Positive                    |
| 41        | 1292        | 32,54        | 33,39       | 26,03        | 38,3       | Positive        | 32,88      | 34,41        | 19,33        | Positive                    |
| 42        | 1284        | 33,54        | 34,22       | 24,94        | 15,2       | Positive        | 33,77      | 34,27        | 20,03        | Positive                    |
| 43        | 1286        | 35           | 35,87       | 26,18        | 3,95       | Positive        | 35,11      | 36,18        | 20,72        | Positive                    |
| 44        | 1293        | 27,57        | 28,06       | 25,65        | 3.730      | Positive        | 27,46      | 28,39        | 20,41        | Positive                    |
| 45        | 1295        | 29,51        | 29,98       | 26,8         | 624        | Positive        | 28,48      | 30,03        | 20,06        | Positive                    |
| 46        | 1296        | 29,15        | 29,47       | 25,88        | 869        | Positive        | 28,82      | 29,94        | 20,11        | Positive                    |
| 47        | 1297        | 32,18        | 32,81       | 27,07        | 53,2       | Positive        | 32,62      | 33,01        | 20,42        | Positive                    |
| 48        | 1382        | N/A          | N/A         | 30,76        | N/A        | Negative        | N/A        | N/A          | 20,14        | Negative                    |
| 49        | 1383        | N/A          | N/A         | 30,47        | N/A        | Negative        | N/A        | N/A          | 20,05        | Negative                    |
| 50        | 1384        | N/A          | N/A         | 26,97        | N/A        | Negative        | N/A        | N/A          | 20,39        | Negative                    |
| 51        | 1385        | N/A          | N/A         | 24,36        | N/A        | Negative        | N/A        | N/A          | 20,2         | Negative                    |
| 52        | 1386        | N/A          | N/A         | 28,68        | N/A        | Negative        | N/A        | N/A          | 20,17        | Negative                    |
| 53        | 1391        | N/A          | N/A         | 24,84        | N/A        | Negative        | N/A        | N/A          | 19,48        | Negative                    |
| 54        | 1392        | N/A          | N/A         | 26,99        | N/A        | Negative        | N/A        | N/A          | 20,05        | Negative                    |
| 55        | 1409        | N/A          | N/A         | 28,09        | N/A        | Negative        | N/A        | N/A          | 19,92        | Negative                    |
| 56        | 1411        | N/A          | N/A         | 29,92        | N/A        | Negative        | N/A        | N/A          | 20,05        | Negative                    |

|           |             |              |              |              |             |                 |            |              |              |                      |
|-----------|-------------|--------------|--------------|--------------|-------------|-----------------|------------|--------------|--------------|----------------------|
| 57        | 1412        | N/A          | N/A          | 27,49        | N/A         | Negative        | N/A        | N/A          | 20,33        | Negative             |
| 58        | 1413        | N/A          | N/A          | 29,25        | N/A         | Negative        | N/A        | N/A          | 20,26        | Negative             |
| 59        | 1414        | N/A          | N/A          | 28,59        | N/A         | Negative        | N/A        | N/A          | 20,02        | Negative             |
| 60        | 1415        | N/A          | N/A          | 28,14        | N/A         | Negative        | N/A        | N/A          | 19,81        | Negative             |
| 61        | 1416        | N/A          | N/A          | 27,24        | N/A         | Negative        | N/A        | N/A          | 20,68        | Negative             |
| 62        | 1550        | 34,41        | 33,99        | 30,16        | 12,5        | Positive        | 33,55      | 34,48        | 20,19        | Positive             |
| 63        | 1556        | 36,16        | 38,06        | 29,75        | 2,77        | Positive        | 36,19      | 35,76        | 20,5         | Positive             |
| 64        | 1564        | 32,86        | 33,51        | 31,34        | 20,9        | Positive        | 32,96      | 33,08        | 20,07        | Positive             |
| <b>65</b> | <b>1575</b> | <b>34,86</b> | <b>37,11</b> | <b>28,18</b> | <b>4,36</b> | <b>Positive</b> | <b>N/A</b> | <b>36,91</b> | <b>20,06</b> | Presumptive Positive |
| <b>66</b> | <b>1581</b> | <b>35,35</b> | <b>36,02</b> | <b>27,22</b> | <b>2,96</b> | <b>Positive</b> | <b>N/A</b> | <b>37,83</b> | <b>20,81</b> | Presumptive Positive |
| 67        | 1582        | 33,23        | 34,24        | 27,05        | 15,6        | Positive        | 34         | 33,52        | 20,13        | Positive             |
| 68        | 1586        | 38,58        | 38,21        | 29,01        | 49,1        | Positive        | 37,77      | 36,77        | 19,94        | Positive             |
| 69        | 1589        | 32,08        | 33,21        | 27,14        | 152         | Positive        | 33,7       | 33,28        | 20,08        | Positive             |
| 70        | 1597        | 34,97        | 37,41        | 32,01        | 27,1        | Positive        | 40,03      | 36,01        | 19,99        | Positive             |
| <b>71</b> | <b>1603</b> | <b>36,41</b> | <b>40,02</b> | <b>24,74</b> | <b>3,83</b> | <b>Positive</b> | <b>N/A</b> | <b>N/A</b>   | <b>21,18</b> | <b>Negative</b>      |
| 72        | 315         | 34,64        | 39,15        | 26,39        | 17,3        | Positive        | 35,08      | 35,19        | 21,14        | Positive             |
| 73        | 347         | 29,24        | 30,84        | 30,06        | 488         | Positive        | 29,08      | 30,46        | 20,89        | Positive             |
| 74        | 351         | 34,1         | 36,68        | 31,47        | 15,1        | Positive        | 33,91      | 34,16        | 21,06        | Positive             |
| 75        | 357         | 38,05        | 39,64        | 33,8         | 3,34        | Positive        | 35,07      | 35,04        | 21,13        | Positive             |
| 76        | 365         | 31           | 33,71        | 28,74        | 139         | Positive        | 31,04      | 31,39        | 20,98        | Positive             |
| 77        | 372         | 36,27        | 38,44        | 28,63        | 1,23E+00    | Positive        | 38,62      | 36,24        | 20,04        | Positive             |
| <b>78</b> | <b>782</b>  | <b>38,29</b> | <b>40,01</b> | <b>26,58</b> | <b>0,71</b> | <b>Positive</b> | <b>N/A</b> | <b>39,16</b> | <b>20,93</b> | Presumptive Positive |
| 79        | 783         | 32,76        | 35,79        | 31,05        | 86,3        | Positive        | 32,45      | 32,92        | 21,02        | Positive             |
| 80        | 856         | 33,17        | 33,35        | 23,06        | 54,8        | Positive        | 33,81      | 33,5         | 19,92        | Positive             |
| 81        | 878         | 35,03        | 41,35        | 30,933317    | 12          | Positive        | 33,65      | 34,25        | 20,81        | Positive             |
| 82        | 945         | 35,05        | 40,11        | 30,8         | 5,74        | Positive        | 34,37      | 34,48        | 21,03        | Positive             |
| 83        | 946         | 35,8         | 40,02        | 30,2         | 2,86        | Positive        | 33,3       | 34,52        | 20,83        | Positive             |
| 84        | 949         | 34,95        | 40,2         | 36,68        | 6,32        | Positive        | 32,15      | 32,25        | 20,89        | Positive             |
| 85        | 952         | 34,65        | 39,77        | 35,53        | 8,35        | Positive        | 32,36      | 33,39        | 21,1         | Positive             |
| 86        | 952c        | 38,58        | 40,06        | 27,74        | 1,24        | Positive        | 38,17      | 38           | 20,8         | Positive             |
| 87        | 955         | 34,6         | 40,02        | 33           | 8,79        | Positive        | 32,77      | 33,01        | 21,08        | Positive             |

|     |      |       |       |       |        |          |       |       |       |          |
|-----|------|-------|-------|-------|--------|----------|-------|-------|-------|----------|
| 88  | 963  | 32,66 | 38,06 | 34,64 | 53,4   | Positive | 29,96 | 29,83 | 20,81 | Positive |
| 89  | 965  | 26,7  | 32,92 | 35,75 | 13.900 | Positive | 23,24 | 24,35 | 20,74 | Positive |
| 90  | 966  | 32,76 | 37,49 | 27,44 | 48,8   | Positive | 31,08 | 32,23 | 20,93 | Positive |
| 91  | 967  | 31,34 | 36,15 | 32,29 | 184    | Positive | 27,62 | 29,05 | 20,96 | Positive |
| 92  | 988  | 35,59 | 39,27 | 34,22 | 6,01   | Positive | 30,11 | 31,29 | 20,04 | Positive |
| 93  | 991  | 33,51 | 38,74 | 38,2  | 33,7   | Positive | 30,96 | 31,25 | 20,08 | Positive |
| 94  | 997  | 33,11 | 38,4  | 38,3  | 47     | Positive | 27,8  | 27,16 | 20,74 | Positive |
| 95  | 527  | 35,42 | 34,25 | 35,18 | 10,3   | Positive | 38,78 | 36,52 | 20,52 | Positive |
| 96  | 1353 | N/A   | N/A   | 29,47 | N/A    | Negative | N/A   | N/A   | 19,21 | Negative |
| 97  | 1355 | N/A   | N/A   | 29,76 | N/A    | Negative | N/A   | N/A   | 20,03 | Negative |
| 98  | 1356 | N/A   | N/A   | 29,66 | N/A    | Negative | N/A   | N/A   | 19,59 | Negative |
| 99  | 1357 | N/A   | N/A   | 27,51 | N/A    | Negative | N/A   | N/A   | 19,03 | Negative |
| 100 | 1358 | N/A   | N/A   | 27,71 | N/A    | Negative | N/A   | N/A   | 19,19 | Negative |
| 101 | 1361 | N/A   | N/A   | 28,71 | N/A    | Negative | N/A   | N/A   | 20,24 | Negative |
| 102 | 1362 | N/A   | N/A   | 28,73 | N/A    | Negative | N/A   | N/A   | 20,35 | Negative |
| 103 | 1363 | N/A   | N/A   | 30,24 | N/A    | Negative | N/A   | N/A   | 19,23 | Negative |
| 104 | 1364 | N/A   | N/A   | 30,04 | N/A    | Negative | N/A   | N/A   | 19,49 | Negative |
